# Supplementary material for: Active Case Finding for Tuberculosis through TOUCH Agents in Selected High TB Burden Wards of Kolkata, India: A Mixed-methods Study on Outcomes and Implementation Challenges
Source: Preprints.org preprint supplement (doi:10.20944/preprints201909.0123.v1), 2019-09-11

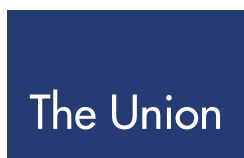

International Union Against  
Tuberculosis and Lung Disease  
*Health solutions for the poor*

Union Internationale  
Contre la Tuberculose  
et les Maladies Respiratoires

Unión Internacional  
Contra la Tuberculosis y  
Enfermedades Respiratorias

## Ethics Advisory Group

Date: 30.1.19

To Abhijit Dey

**Title of research project:** Active case finding for Tuberculosis under a project in Kolkata, an Urban district in eastern India: A mixed methods study on outputs and implementation challenges

**EAG number:** 130/18

**Principal Investigator:** Abhijit Dey, Tuberculosis Health Action Learning Initiative (THALI), Kolkata, West Bengal

### Co-Investigators:

Pruthi Thekkur, International Union Against Tuberculosis and Lung Diseases. Paris, France

Sharath BN, ESIC Medical College and PGIMS, Bengaluru, India

Milan K Dinda, THALI, Kolkata, West Bengal

S Parthiban, THALI, Kolkata, West Bengal

Vivek Sharma, THALI, Kolkata, West Bengal

Isita Roy, THALI, Kolkata, West Bengal

Rangan Sengupta, THALI, Kolkata, West Bengal

Pallab Bhattacharya, THALI, Kolkata, West Bengal

Tanushri Dasgupta, THALI, Kolkata, West Bengal

Anuradha Chanda, THALI, Kolkata, West Bengal

Namita Dimari, THALI, Kolkata, West Bengal

Arista Lahiri, Calcutta Medical College, Kolkata

Arindam Singha Mahapatra, R.G Kar Medical College, Kolkata

Sanghamitra Ghosh, General Secretary, Indian Public Health Association

B.K. Saha, State Tuberculosis Officer, West Bengal, India

Thank you for your application to the Ethics Advisory Group of the Union. Your study has our formal approval.

- Please note that this approval is provisional until we receive from you a copy of the **approval certificate of your national or regional or relevant Ethics committee**. If this is not available, the EAG requires an explanation. If you have applied, but do not yet have the result, please ensure that you send a copy on receipt to [eag@theunion.org](mailto:eag@theunion.org)
- Any changes to the approved protocol need to be sent to the EAG, using the form for **extension/modification** of proposals (to be found on the Union website under EAG)
- **Progress reports** must be provided for renewal of EAG approval for all studies on human participants that are not completed within 12 months of EAG approval. Studies of existing records are **excluded** from this requirement.
- **Final report** The EAG requires the executive summary or the abstract of all study reports or papers within 90 days of the completion of the study
- Random site visits may be carried out to ensure that informed consent procedures are appropriate

We trust that your study proceeds well and that it will be productive.

With best wishes,

**Dr. Justin Denholm,**  
**Chairperson**

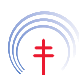

Supplement: Supplementary file 4 [file supplementary:UNION%20EAG%20130_18_Abhijit_Dey_approval.pdf]
