# Supplementary material for: Active Case Finding for Tuberculosis through TOUCH Agents in Selected High TB Burden Wards of Kolkata, India: A Mixed-methods Study on Outcomes and Implementation Challenges
Source: Preprints.org preprint supplement (doi:10.20944/preprints201909.0123.v1), 2019-09-11
Supplement: Supplementary file 1 [file supplementary:COMJNMH%20Abhijit%20dey%20IEC.pdf]

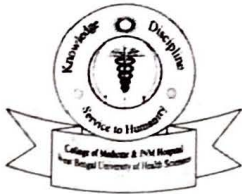

**Office of the Institutional Ethics Committee**

Regn. No. ECR/674/Inst/WB/2014/RR-17

College of Medicine & J.N.M. Hospital

West Bengal University of Health Sciences

Kalyani, Nadia, West Bengal, 741235

Tele-fax: (033) 2582 8562, (033) 25828386 (Extn. 309)

ieccomjnmh@gmail.com

JUNE 14, 2019

REF. NO. F-24/PR/COMJNMH/IEC/19/142

**Chairperson:**

Prof. Sharmila Sengupta  
Director, NIBMG, Kalyani

**Member Secretary:**

Dr. Suman Kumar Roy  
Professor, COMJNMH,  
Kalyani

**Basic Scientist:**

Dr. Chanchal Kumar Dalai  
Associate Professor,  
COMJNMH, Kalyani

Dr. Anindita Sinha Babu,  
Associate Professor,  
COMJNMH, Kalyani

Dr. Kuhu Pal,  
Associate Professor,  
COMJNMH, Kalyani

Dr. Shouvanik Adhya,  
Associate Professor,  
COMJNMH, Kalyani

**Clinician:**

Dr. Manidip Pal  
Professor, COMJNMH,  
Kalyani

Dr. Indranil Halder,  
Assistant Professor,  
COMJNMH, Kalyani

Dr. Kaustav Chakraborty  
Associate Professor,  
COMJNMH, Kalyani

Dr. Ritesh Singh  
Associate Professor,  
COMJNMH, Kalyani

**Theologist:**

Sri Sri Shyam Chaitanya  
Maharaj, Monk

**Legal person:**

Mr Sourik Mukherjee,  
Advocate

**Lay person:**

Mr. Krishna Saha

To

Dr. Abhijit Dey,

Senior Medical Consultant,

Tuberculosis Health Action Learning Initiative (THALI) Project, Kolkata

**Ref: Study title:** 'Active case finding for Tuberculosis under a project in Kolkata, an Urban District in Eastern India: a mixed methods study on outputs and implementation challenges'

**Sub: Approval of the above referenced research project**

Dear Dr. Abhijit Dey,

The 17<sup>th</sup> review meeting of the Institutional Ethics Committee of College of Medicine and JNM Hospital, WBUHS, Kalyani was held on the 29<sup>th</sup> May 2019 in the Medical Education Unit Room of the administrative building of the medical college under the chairmanship of Dr. Sharmila Sengupta, Director, National Institute of Biomedical Genomics, Kalyani. Following members were present in the meeting

1. Prof Sharmila Sengupta
2. Prof Suman Kumar Roy
3. Dr. Chanchal Kumar Dalai
4. Dr. Manidip Pal
5. Dr. Kuhu Pal
6. Dr. Shouvanik Adhya
7. Dr. Indranil Halder
8. Dr. Anindita Sinha Babu
9. Dr. Ritesh Singh
10. Sri Sri Shyam Chaitanya Maharaj
11. Mr. Sourik Mukherjee
12. Mr. Krishna Saha

The IEC is pleased to grant approval of your above referenced research study. You are to note the following points:

1. A brief project report to be submitted to the IEC on completion of the study.
2. If the project duration is for more than one year, brief annual report should be submitted to IEC on every year of completion of the study.

Thanking you.  
Sincerely yours,

  
Dr. Suman Kumar Roy  
Member Secretary

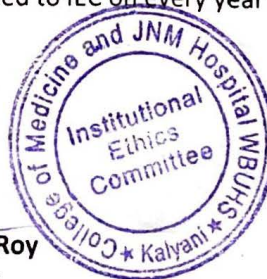

  
Dr. Sharmila Sengupta  
Chairperson

Most people say that it is the intellect which makes a great scientist. They are wrong: it is the character.

**Member Secretary**  
Institutional Ethics Committee  
College of Medicine and JNM Hospital  
WBUHS, Kalyani, Nadia

**Chairperson**  
Institutional Ethics Committee  
College of Medicine and JNM Hospital  
WBUHS, Kalyani, Nadia

- Albert Einstein
