# Supplementary material for: Active Case Finding for Tuberculosis through TOUCH Agents in Selected High TB Burden Wards of Kolkata, India: A Mixed-methods Study on Outcomes and Implementation Challenges
Source: Preprints.org preprint supplement (doi:10.20944/preprints201909.0123.v1), 2019-09-11
Supplement: Supplementary file 2 [file supplementary:Project%20directors%20permission.pdf]

India Headquarters  
BB-11, Greater Kailash Enclave II  
New Delhi 100 048, India  
Telephone: +91 11 66500700  
Fax: +91 11 66500738  
Email: [whp-india@worldhealthpartners.org](mailto:whp-india@worldhealthpartners.org)

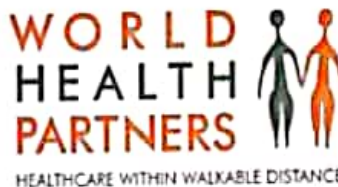

**Kolkata Office**  
3-5<sup>th</sup> floors, Sukrishna Bhawan  
757/1 Madurdaha, Kolkata- 700107  
Telephone: +913324438050  
Website: <http://whpindia.org/>

To,  
The Course Coordinator  
National SORT IT OR course – 2018  
The Union South East Asia Office  
New Delhi, India – 110017

**Sub: Statement from supervisor – National SORT IT OR course – 2018**

Dear course coordinator,

I support the application of ...Dr Abhijit Dey.... for National SORT IT OR course – 2018 conducted by The Union South East Asia office, New Delhi, India. If selected, he/she will be granted permission to attend all three modules of the course (Module 1: 20-25 August 2018; Module 2: 27-31 August 2018; and Module 3: February 2019), have time and opportunity to carry out and publish operational research (with applicant being the first author) and adhere to all the course milestones and timelines on his/her return to the project /disease-control programme / health institution.

I understand that this is a training programme and the course will not provide any funds for conduct of the research.

  
Supervisor's signature:  
  
**Dr Milan K Dinda, Project Director, Tuberculosis Health Action Learning Initiative**  
(Supervisor's name and affiliation)

Date: .....29<sup>th</sup> June 2018.....
