# Supplementary material for: Active Case Finding for Tuberculosis through TOUCH Agents in Selected High TB Burden Wards of Kolkata, India: A Mixed-methods Study on Outcomes and Implementation Challenges
Source: Preprints.org preprint supplement (doi:10.20944/preprints201909.0123.v1), 2019-09-11
Supplement: Supplementary file 3 [file supplementary:STOs%20Permission%20for%20OR.pdf]

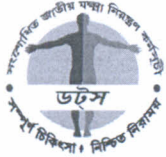

# GOVERNMENT OF WEST BENGAL

DIRECTORATE OF HEALTH SERVICES  
OFFICE OF THE OSD & JOINT DIRECTOR OF HEALTH SERVICES & STO  
SWASTHYA BHAVAN

Sector – V, Block – GN/29, Salt Lake City, Kolkata – 700091

☎ : (033) 2357 4021 / 2333 0201 / 2333 0200, E-mail : [stowb@rntcp.org](mailto:stowb@rntcp.org)

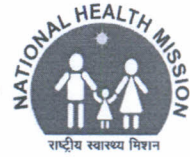

Memo No. DO-6/2019/

Dated : 15.05.2019

To

Dr Abhijit Dey,

Sr Medical Consultant

THALI Project

Very glad to know that you have taken initiative and submitted a concept note for an operations research titled "Active case finding for Tuberculosis under a project in Kolkata, an Urban district in eastern India: A mixed methods study on outputs and implementation challenges" and accepted by the UNION & UKAID.

The topic of the OR is very impressive and it is sure that the findings of the study will be beneficial for the RNTCP. Also the final results of the study will give us the opportunity for the corrective action and program modification and development.

Your idea and efforts made in this paper is very much convincing and agreed to contribute something based on my knowledge and experience by becoming an author of this paper.

**OSD & Joint Director of Health Services  
In-charge of State Tuberculosis Officer  
Govt. of West Bengal**
